# Supplementary material for: Phylogeographic Pattern of the Assassin Bug Sycanus bifidus Inferred from Mitochondrial Genomes and Nuclear Genes
Source: MDPI journal article supplement (doi:10.3390/biology13050305), 2024-04-28
Supplement: s1 [file s1]

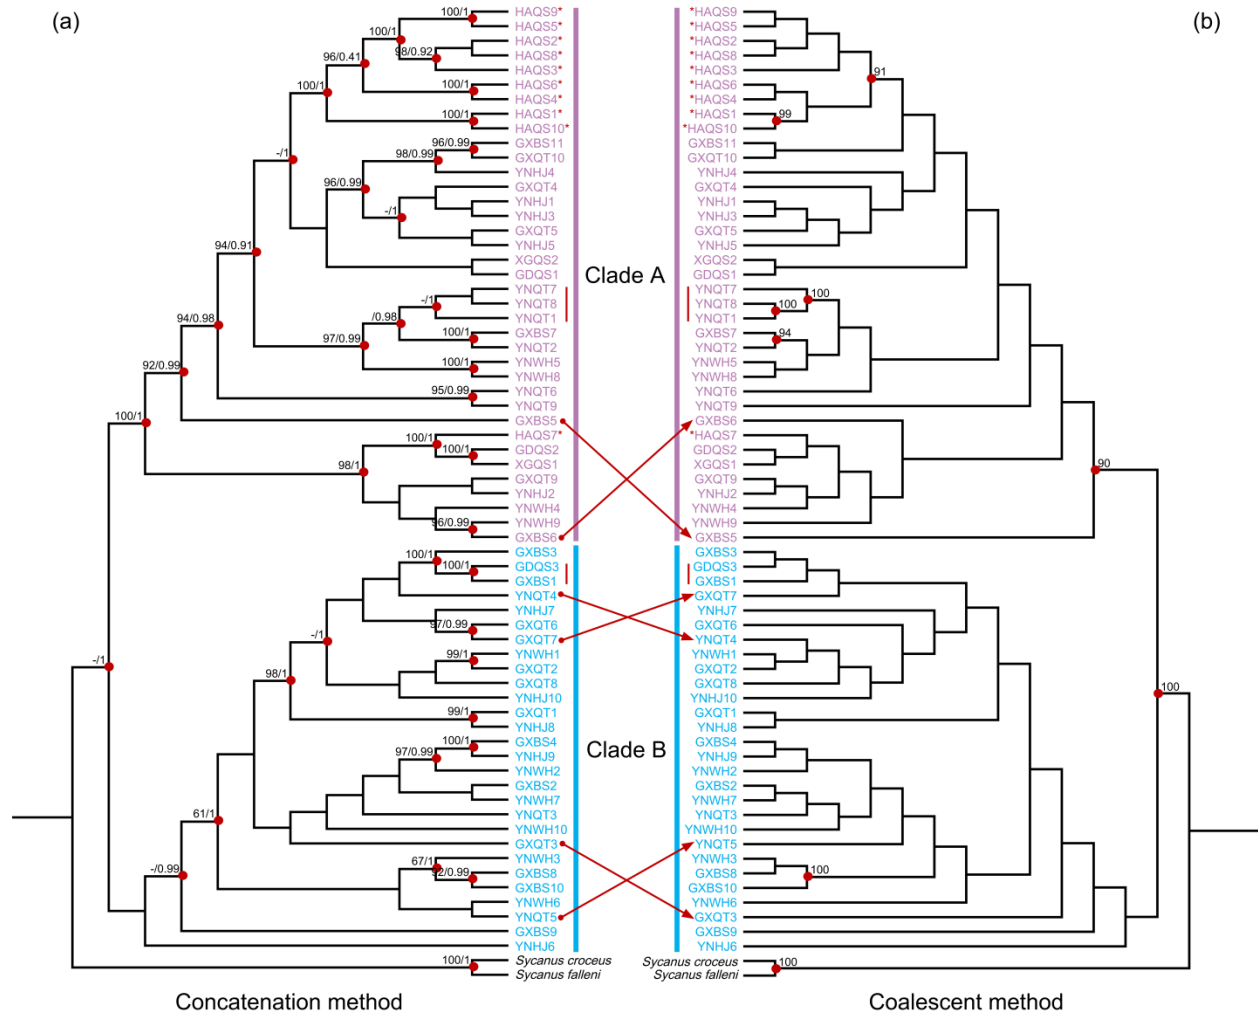

**Figure S1. Phylogenetic relationships of *Sycanus bifidus* derived from mitochondrial gene sequences.** (a) Tree topology conducted with the concatenation method. The numbers at the nodes represent the bootstrap supports (red nots, > 90) in Maximum-likelihood analysis using IQ-TREE and posterior probability (red nots, > 0.9) in Bayesian inference analysis using MrBayes. (b) Tree topology from multispecies coalescent (MSC) analysis performed with ASTRAL. Numbers at the nodes indicate posterior probabilities of MSC (red nots, > 90). (a, b) Phylogeographic clades are differentiated by colors. Individuals from Hainan Island are denoted with red asterisks, and those sharing the same haplotype are indicated with red lines. Topological discrepancy between concatenation and coalescent methods are indicated with red arrows.

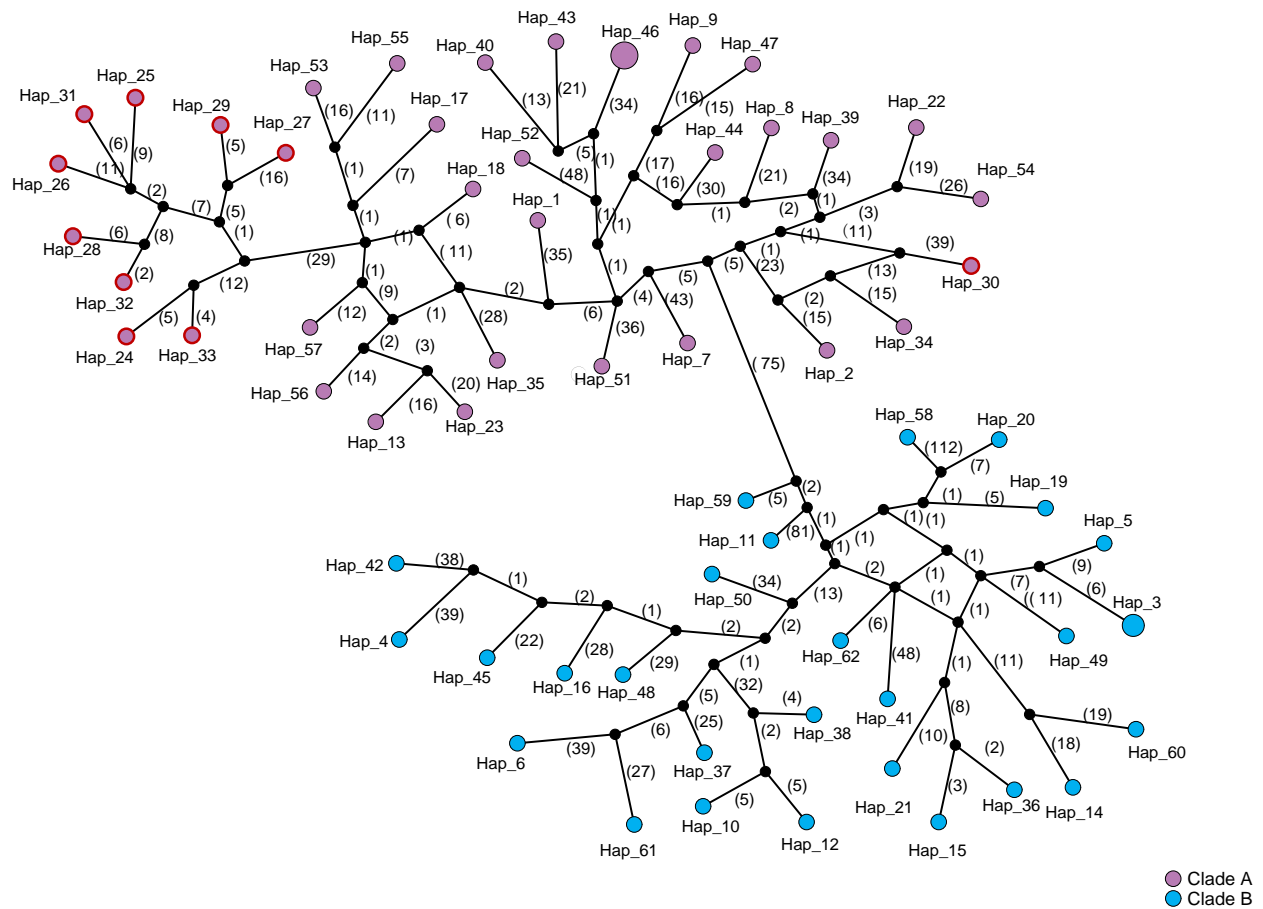

**Figure S2. Haplotype network for *S. bifidus* constructed from the concatenated mitochondrial genes.** Each colored circle corresponds to a distinct observed haplotype, while black circles indicate hypothesized haplotypes not detected in the samples. Numbers along the connecting lines denote the number of mutation steps between haplotypes. Circle size is proportional to haplotype frequency. The colors of the circles match those used in Figure 3 to denote the same phylogeographic clade. Haplotypes identified in the Hainan Island population are enclosed in a red outline.

**Table S1. Information for *Sycanus bifidus* specimens used in this study.**

| Code   | Sample locality               | Locality code | Longitude (E) | Latitude (N) | Collection dates | MG | NG | Haplotype code (concatenated dataset) | Haplotype code (mitochondrial genes) |
|--------|-------------------------------|---------------|---------------|--------------|------------------|----|----|---------------------------------------|--------------------------------------|
| YNWH1  | Malipo, Wenshan, Yunnan       | 1             | 104.70        | 23.12        | 08/17/2015       | √  | √  | Hap16                                 | Hap36                                |
| YNWH2  | Mt. Huanglian, Lvchun, Yunnan | 2             | 102.40        | 22.99        | 05/10/2012       | √  | √  | Hap17                                 | Hap37                                |
| YNWH3  | Malipo, Wenshan, Yunnan       | 1             | 104.70        | 23.12        | 08/17/2015       | √  | √  | Hap18                                 | Hap38                                |
| YNWH4  | Mt. Huanglian, Lvchun, Yunnan | 2             | 102.40        | 22.99        | 05/10/2012       | √  | √  | Hap19                                 | Hap39                                |
| YNWH5  | Mt. Huanglian, Lvchun, Yunnan | 2             | 102.40        | 22.99        | 05/10/2012       | √  | √  | Hap20                                 | Hap40                                |
| YNWH6  | Mt. Huanglian, Lvchun, Yunnan | 2             | 102.40        | 22.99        | 05/10/2012       | √  | √  | Hap21                                 | Hap41                                |
| YNWH7  | Mt. Huanglian, Lvchun, Yunnan | 2             | 102.40        | 22.99        | 05/10/2012       | √  | √  | Hap22                                 | Hap42                                |
| YNWH8  | Mt. Huanglian, Lvchun, Yunnan | 2             | 102.40        | 22.99        | 05/10/2012       | √  | √  | Hap23                                 | Hap43                                |
| YNWH9  | Mt. Huanglian, Lvchun, Yunnan | 2             | 102.40        | 22.99        | 05/10/2012       | √  | √  | Hap24                                 | Hap44                                |
| YNWH10 | Mt. Huanglian, Lvchun, Yunnan | 2             | 102.40        | 22.99        | 06/11/2013       | √  | √  | Hap25                                 | Hap45                                |
| YNHJ1  | Hekou, Honghe, Yunnan         | 3             | 103.33        | 22.53        | 05/20/2011       | √  | √  | Hap6                                  | Hap53                                |
| YNHJ2  | Jinping, Honghe, Yunnan       | 4             | 103.22        | 22.78        | 09/24/2012       | √  | √  | Hap7                                  | Hap54                                |
| YNHJ3  | Hekou, Honghe, Yunnan         | 3             | 103.33        | 22.53        | 05/20/2011       | √  | √  | Hap8                                  | Hap55                                |
| YNHJ4  | Hekou, Honghe, Yunnan         | 3             | 103.33        | 22.53        | 05/20/2011       | √  | √  | Hap9                                  | Hap56                                |
| YNHJ5  | Hekou, Honghe, Yunnan         | 3             | 103.33        | 22.53        | 05/20/2011       | √  | √  | Hap10                                 | Hap57                                |
| YNHJ6  | Hekou, Honghe, Yunnan         | 3             | 103.33        | 22.53        | 05/20/2011       | √  | √  | Hap11                                 | Hap58                                |
| YNHJ7  | Hekou, Honghe, Yunnan         | 3             | 103.33        | 22.53        | 05/20/2011       | √  | √  | Hap12                                 | Hap59                                |
| YNHJ8  | Hekou, Honghe, Yunnan         | 3             | 103.33        | 22.53        | 05/20/2011       | √  | √  | Hap13                                 | Hap60                                |
| YNHJ9  | Hekou, Honghe, Yunnan         | 3             | 103.33        | 22.53        | 05/20/2011       | √  | √  | Hap14                                 | Hap61                                |
| YNHJ10 | Hekou, Honghe, Yunnan         | 3             | 103.33        | 22.53        | 05/20/2011       | √  | √  | Hap15                                 | Hap62                                |
| YNQT1  | Mt. Jinuo, Jinghong, Yunnan   | 9             | 100.99        | 22.07        | 07/25/2021       | √  | √  | Hap1                                  | Hap46                                |
| YNQT2  | Simao, Puer, Yunnan           | 6             | 100.97        | 22.78        | 05/13/2018       | √  | √  | Hap2                                  | Hap47                                |
| YNQT3  | Mengla, Xishuangbanna, Yunnan | 10            | 101.56        | 21.46        | 05/08/2015       | √  | √  | Hap3                                  | Hap48                                |
| YNQT4  | Yuanjiang, Yuxi, Yunnan       | 5             | 102.03        | 23.34        | 08/18/2014       | √  |    | Hap49                                 | Hap49                                |
| YNQT5  | Mojiang, Puer, Yunnan         | 7             | 100.97        | 22.83        | 09/05/2005       | √  |    | Hap50                                 | Hap50                                |

|        |                                |    |        |       |            |   |   |       |       |
|--------|--------------------------------|----|--------|-------|------------|---|---|-------|-------|
| YNQT6  | Fengqing, Lincang, Yunnan      | 8  | 100.08 | 24.58 | 06/20/2005 | √ | √ | Hap51 | Hap51 |
| YNQT7  | Mt. Jinuo, Jinghong, Yunnan    | 9  | 100.99 | 22.07 | 07/25/2021 | √ | √ | Hap1  | Hap46 |
| YNQT8  | Mt. Jinuo, Jinghong, Yunnan    | 9  | 100.99 | 22.07 | 07/25/2021 | √ | √ | Hap1  | Hap46 |
| YNQT9  | Mengla, Xishuangbanna, Yunnan  | 10 | 101.56 | 21.46 | 03/24/2013 | √ | √ | Hap5  | Hap52 |
| GDQS1  | Yangchun, Yangjiang, Guangdong | 12 | 111.79 | 22.17 | 04/30/2002 | √ | √ | Hap44 | Hap1  |
| GDQS2  | Huicheng, Huizhou, Guangdong   | 11 | 114.38 | 23.08 | 08/19/2004 | √ | √ | Hap45 | Hap2  |
| GDQS3  | Meixian, Meizhou, Guangdong    | 13 | 116.10 | 24.29 | 09/06/1981 | √ | √ | Hap26 | Hap3  |
| GXBS1  | Napo, Baise, Guangxi           | 15 | 105.84 | 23.41 | 08/10/2016 | √ | √ | Hap26 | Hap3  |
| GXBS2  | Leye, Baise, Guangxi           | 14 | 106.56 | 24.78 | 08/28/2006 | √ | √ | Hap27 | Hap4  |
| GXBS3  | Napo, Baise, Guangxi           | 15 | 105.84 | 23.41 | 08/10/2016 | √ | √ | Hap28 | Hap5  |
| GXBS4  | Napo, Baise, Guangxi           | 15 | 105.84 | 23.41 | 08/10/2016 | √ | √ | Hap29 | Hap6  |
| GXBS5  | Napo, Baise, Guangxi           | 15 | 105.84 | 23.41 | 08/10/2016 | √ |   |       | Hap7  |
| GXBS6  | Napo, Baise, Guangxi           | 15 | 105.84 | 23.41 | 08/10/2016 | √ | √ | Hap30 | Hap8  |
| GXBS7  | Napo, Baise, Guangxi           | 15 | 105.84 | 23.41 | 08/10/2016 | √ | √ | Hap31 | Hap9  |
| GXBS8  | Napo, Baise, Guangxi           | 15 | 105.84 | 23.41 | 08/10/2016 | √ | √ | Hap32 | Hap10 |
| GXBS9  | Napo, Baise, Guangxi           | 15 | 105.84 | 23.41 | 08/10/2016 | √ | √ | Hap33 | Hap11 |
| GXBS10 | Napo, Baise, Guangxi           | 15 | 105.84 | 23.41 | 08/10/2016 | √ | √ | Hap34 | Hap12 |
| GXBS11 | Napo, Baise, Guangxi           | 15 | 105.84 | 23.41 | 08/10/2016 | √ | √ | Hap35 | Hap13 |
| GXQT1  | Longzhou, Chongzuo, Guangxi    | 19 | 106.98 | 22.57 | 05/26/2020 | √ | √ | Hap36 | Hap14 |
| GXQT2  | Mt. Daming, Wuming, Guangxi    | 17 | 108.28 | 23.16 | 05/26/2020 | √ | √ | Hap37 | Hap15 |
| GXQT3  | Shiwandashan, Shangsi, Guangxi | 16 | 107.98 | 22.15 | 05/24/2017 | √ | √ | Hap38 | Hap16 |
| GXQT4  | Shiwandashan, Shangsi, Guangxi | 16 | 107.98 | 22.15 | 05/24/2017 | √ | √ | Hap39 | Hap17 |
| GXQT5  | Shiwandashan, Shangsi, Guangxi | 16 | 107.98 | 22.15 | 05/24/2017 | √ | √ | Hap40 | Hap18 |
| GXQT6  | Longrui, Ningming, Guangxi     | 20 | 107.07 | 22.14 | 05/18/2006 | √ | √ | Hap41 | Hap19 |
| GXQT7  | Fusui, Chongzuo, Guangxi       | 18 | 107.90 | 22.63 | 08/18/2004 | √ | √ | Hap42 | Hap20 |
| GXQT8  | Longzhou, Chongzuo, Guangxi    | 19 | 106.98 | 22.57 | 05/26/2020 | √ |   |       | Hap21 |
| GXQT9  | Longzhou, Chongzuo, Guangxi    | 19 | 106.98 | 22.57 | 05/26/2020 | √ |   |       | Hap22 |
| GXQT10 | Shiwandashan, Shangsi, Guangxi | 16 | 107.98 | 22.15 | 05/24/2017 | √ | √ | Hap43 | Hap23 |
| XGQS1  | Lidao, Hong Kong               | 21 | 113.92 | 22.22 | 05/12/2019 | √ | √ | Hap46 | Hap34 |

|        |                              |    |        |       |            |   |   |       |       |
|--------|------------------------------|----|--------|-------|------------|---|---|-------|-------|
| XGQS2  | Lidao, Hong Kong             | 21 | 113.92 | 22.22 | 05/22/2019 | √ | √ | Hap47 | Hap35 |
| HAQS1  | Yinggeling, Baisha, Hainan   | 22 | 109.35 | 18.92 | 10/08/2008 | √ | √ | Hap48 | Hap24 |
| HAQS2  | Yinggeling, Baisha, Hainan   | 22 | 109.35 | 18.92 | 10/08/2008 | √ | √ | Hap49 | Hap25 |
| HAQS3  | Yinggeling, Baisha, Hainan   | 22 | 109.35 | 18.92 | 10/08/2008 | √ | √ | Hap50 | Hap26 |
| HAQS4  | Yinggeling, Baisha, Hainan   | 22 | 109.35 | 18.92 | 10/08/2008 | √ |   |       | Hap27 |
| HAQS5  | Fanyang, Wuzhishan, Hainan   | 24 | 109.52 | 18.78 | 10/26/2008 | √ | √ | Hap51 | Hap28 |
| HAQS6  | Yinggeling, Baisha, Hainan   | 22 | 109.35 | 18.92 | 05/30/2008 | √ | √ | Hap52 | Hap29 |
| HAQS7  | Yinggeling, Baisha, Hainan   | 22 | 109.35 | 18.92 | 05/30/2008 | √ | √ | Hap53 | Hap30 |
| HAQS8  | Yinggeling, Baisha, Hainan   | 22 | 109.35 | 18.92 | 05/30/2008 | √ | √ | Hap54 | Hap31 |
| HAQS9  | Jianfengling, Ledong, Hainan | 23 | 108.90 | 18.73 | 05/10/2007 | √ | √ | Hap55 | Hap32 |
| HAQS10 | Yinggeling, Baisha, Hainan   | 22 | 109.35 | 18.92 | 04/28/2008 | √ | √ | Hap56 | Hap33 |

“√”, indicates that mitogenome or nuclear rRNA genes have been obtained.

**Table S2. Best-fit schemes and substitution models for phylogenetic analyses.**

| Subset | Best model | Partition                                                                                                                                                                                                                   |
|--------|------------|-----------------------------------------------------------------------------------------------------------------------------------------------------------------------------------------------------------------------------|
| 1      | TRN+I      | <i>28SrRNA, 18SrRNA, 5_8SrRNA, cox1_pos1, cox3_pos1, cob_pos1, cox2_pos1, cox2_pos2, cox1_pos2, cob_pos2, cox3_pos2, nad4l_pos2, nad6_pos2, nad5_pos2, atp8_pos2, atp6_pos2, nad2_pos2, nad1_pos2, nad3_pos2, nad4_pos2</i> |
| 2      | TIM+G      | <i>nad4_pos3, nad4l_pos3, nad5_pos3, nad1_pos3, nad2_pos3, cox1_pos3, atp6_pos3, cox3_pos3, nad3_pos3, cob_pos3, cox2_pos3, nad6_pos3, atp8_pos3</i>                                                                        |
| 3      | TIM+I+G    | <i>16SrRNA, ITS2Misc_RNA, ITS1Misc_RNA, nad1_pos1, nad4l_pos1, nad5_pos1, nad4_pos1, nad6_pos1, nad3_pos1, atp6_pos1, atp8_pos1, 12SrRNA, nad2_pos1, 22tRNA</i>                                                             |

**Table S3. Best-fit schemes and substitution models for estimation of divergence time.**

| Subset | Best model | Sites | Partition                       |
|--------|------------|-------|---------------------------------|
| 1      | GTR+I+G+X  | 11076 | <i>coxI</i> , 12 <i>PCGs</i>    |
| 2      | GTR+I+G+X  | 2370  | 2 <i>ITSs</i> , 22 <i>tRNAs</i> |
| 3      | GTR+I+G+X  | 8120  | 5 <i>rRNAs</i>                  |

**Table S4. Genetic diversity based on different dataset.**

| Dataset              | $N$ | $S$  | $H$ | $Hd$  | $\pi$   |
|----------------------|-----|------|-----|-------|---------|
| Mitogenomic dataset  | 65  | 1027 | 62  | 0.998 | 0.00714 |
| Nuclear rRNA dataset | 59  | 4    | 4   | 0.192 | 0.00005 |
| Concatenated dataset | 59  | 970  | 56  | 0.998 | 0.00490 |

$N$ , samples number;  $S$ , segregating sites;  $H$ , haplotype number;  $Hd$ , haplotype diversity;  $\pi$ , nucleotide diversity.



**Table S5. The environmental variable contribution to the Maxent model in ENM analyses for present, LGM and LIG periods.**

| Variable | Present | LGM  | LIG  |
|----------|---------|------|------|
| BIO1     | 1.7     | 0.2  | 0.3  |
| BIO5     | 6.1     | 2.4  | 7.1  |
| BIO6     | 10.5    | 9.1  | 38.4 |
| BIO8     | 9.4     | 7.3  | 5.7  |
| BIO9     | 0.4     | 0.5  | 20.6 |
| BIO10    | 0       | 0    | 0    |
| BIO11    | 37.1    | 37.1 | 9.1  |
| BIO14    | 2.9     | 3.6  | 8.2  |
| BIO17    | 22.3    | 24.9 | 8.8  |
| BIO19    | 9.5     | 14.7 | 1.8  |
